# Supplementary material for: Effect of K2O/SrO on structural, thermal, optical, and mechanical properties of SiO2–B2O3–SnO2 glass for IT/LT-SOFC applications
Source: Royal Society of Chemistry journal article supplement (doi:10.1039/d5ra10040b), 2026-05-18
Supplement: d5ra10040b1.pdf [file d5ra10040b1.pdf]

# **K<sub>2</sub>O/SrO effect on structural, thermal, optical, and mechanical properties of SiO<sub>2</sub>-B<sub>2</sub>O<sub>3</sub>-SnO<sub>2</sub> glass for IT/LT-SOFC application**

**Manish Kumar<sup>1,2</sup>, Akshay Kumar<sup>1</sup>, K. Singh<sup>2,\*</sup>**

\*Corresponding author: kusingh@thapar.edu

<sup>1</sup>Department of Physics, Sardar Patel University, Mandi, Himachal Pradesh-175001, India

<sup>2</sup>Department of Physics and Material Science, Thapar Institute of Engineering and Technology, Patiala-147004, Punjab, India

**Electronic Supplementary Information**

# 1 Raman analysis

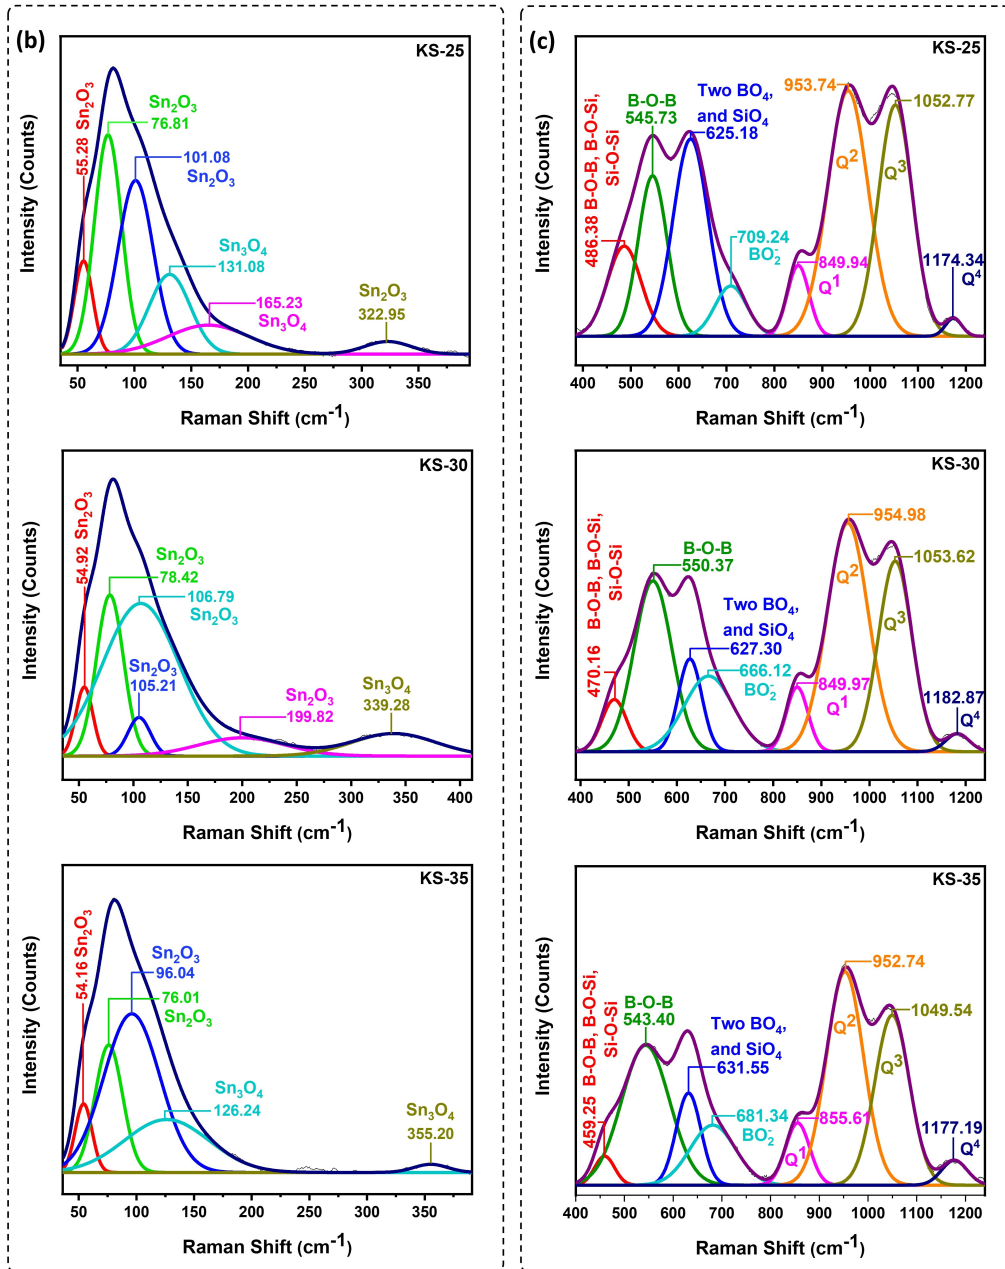

**Figure S 1:** (a) Representative deconvoluted spectra of KS-25, KS-30, and KS-35 glasses in the spectral range of below 400 cm<sup>-1</sup>, and (c) Representative deconvoluted spectra of KS-25, KS-30 and KS-35 glasses in the range of 400-1200 cm<sup>-1</sup>.

## 1.1 Raman peak fitting parameters

- **KS-20**

**Table S 1:** Raman peak fitting parameters for normalized spectrum below 400  $\text{cm}^{-1}$ .

| Peak  | $y_0$   |                | $x_c$    |                | $A$      |                | $w$      |                | Statistics    |            |                         |
|-------|---------|----------------|----------|----------------|----------|----------------|----------|----------------|---------------|------------|-------------------------|
|       | Value   | Standard Error | Value    | Standard Error | Value    | Standard Error | Value    | Standard Error | Red. $\chi^2$ | Adj. $R^2$ | Residual Sum of squares |
| Peak1 | 0.02307 | 4.12E-04       | 56.1706  | 0.21239        | 4.41058  | 0.37821        | 17.76551 | 0.40042        | 1.68E-05      | 0.99971    | 0.01177                 |
| Peak2 | 0.02307 | 4.12E-04       | 77.15995 | 0.66249        | 17.81908 | 2.03991        | 27.81399 | 1.13929        |               |            |                         |
| Peak3 | 0.02307 | 4.12E-04       | 99.69558 | 2.15868        | 11.851   | 5.1062         | 33.87486 | 4.10286        |               |            |                         |
| Peak4 | 0.02307 | 4.12E-04       | 121.6121 | 3.92455        | 22.21909 | 4.4318         | 57.39228 | 4.52613        |               |            |                         |
| Peak5 | 0.02307 | 4.12E-04       | 184.1234 | 3.17008        | 8.31194  | 0.66929        | 89.02201 | 3.6102         |               |            |                         |
| Peak6 | 0.02307 | 4.12E-04       | 316.249  | 0.48161        | 1.08737  | 0.0421         | 38.1865  | 1.31647        |               |            |                         |

**Table S 2:** Raman peak fitting parameters for the normalized spectrum in the region 400 to 1200  $\text{cm}^{-1}$  of KS-20 sample

| Peak  | $y_0$   |                | $x_c$     |                | $A$       |                | $w$       |                | Statistics    |            |                         |
|-------|---------|----------------|-----------|----------------|-----------|----------------|-----------|----------------|---------------|------------|-------------------------|
|       | Value   | Standard Error | Value     | Standard Error | Value     | Standard Error | Value     | Standard Error | Red. $\chi^2$ | Adj. $R^2$ | Residual Sum of squares |
| Peak1 | 0.01498 | 8.17E-04       | 473.46994 | 2.57442        | 14.2138   | 2.5422         | 68.859    | 2.55501        | 9.52E-05      | 0.99914    | 0.17725                 |
| Peak2 | 0.01498 | 8.17E-04       | 543.10447 | 0.88918        | 69.05922  | 3.81599        | 94.11653  | 4.36602        |               |            |                         |
| Peak3 | 0.01498 | 8.17E-04       | 619.82552 | 0.62442        | 27.56967  | 3.213          | 61.76788  | 1.79275        |               |            |                         |
| Peak4 | 0.01498 | 8.17E-04       | 663.00627 | 3.66762        | 38.39473  | 3.06176        | 108.54937 | 3.60519        |               |            |                         |
| Peak5 | 0.01498 | 8.17E-04       | 849.04791 | 0.20016        | 11.17296  | 0.14549        | 49.14865  | 0.49361        |               |            |                         |
| Peak6 | 0.01498 | 8.17E-04       | 958.32898 | 0.1767         | 107.25101 | 0.49187        | 109.43896 | 0.48502        |               |            |                         |
| Peak7 | 0.01498 | 8.17E-04       | 1057.3216 | 0.1445         | 76.63474  | 0.42404        | 79.89771  | 0.24314        |               |            |                         |
| Peak8 | 0.01498 | 8.17E-04       | 1173.5    | 0.77058        | 2.16777   | 0.10606        | 47.90327  | 2.09955        |               |            |                         |

- **KS-25**

**Table S 3:** Raman peak fitting parameters for normalized spectrum below 400  $\text{cm}^{-1}$ .

| Peak  | $y_0$   |                | $x_c$    |                | $A$      |                | $w$      |                | Statistics    |            |                         |
|-------|---------|----------------|----------|----------------|----------|----------------|----------|----------------|---------------|------------|-------------------------|
|       | Value   | Standard Error | Value    | Standard Error | Value    | Standard Error | Value    | Standard Error | Red. $\chi^2$ | Adj. $R^2$ | Residual Sum of squares |
| Peak1 | 0.03736 | 6.48E-04       | 55.28783 | 0.2194         | 6.35979  | 0.36411        | 19.179   | 0.2741         | 1.99E-05      | 0.99975    | 0.01364                 |
| Peak2 | 0.03736 | 6.48E-04       | 76.81196 | 0.57277        | 21.98171 | 3.23781        | 28.16322 | 1.11094        |               |            |                         |
| Peak3 | 0.03736 | 6.48E-04       | 101.0896 | 0.90634        | 22.60812 | 5.88725        | 36.59315 | 4.25982        |               |            |                         |
| Peak4 | 0.03736 | 6.48E-04       | 131.0857 | 4.19492        | 12.03244 | 4.10072        | 42.39549 | 4.57406        |               |            |                         |
| Peak5 | 0.03736 | 6.48E-04       | 165.2373 | 5.65785        | 8.70302  | 1.38792        | 84.30044 | 5.81412        |               |            |                         |
| Peak6 | 0.03736 | 6.48E-04       | 322.9591 | 0.36429        | 2.17661  | 0.07488        | 48.41467 | 1.26355        |               |            |                         |

**Table S 4:** Raman peak fitting parameters for the normalized spectrum in the region 400 to 1200  $\text{cm}^{-1}$  of KS-25 sample

| Peak  | $y_0$   |                | $x_c$    |                | $A$      |                | $w$      |                | Statistics    |            |                         |
|-------|---------|----------------|----------|----------------|----------|----------------|----------|----------------|---------------|------------|-------------------------|
|       | Value   | Standard Error | Value    | Standard Error | Value    | Standard Error | Value    | Standard Error | Red. $\chi^2$ | Adj. $R^2$ | Residual Sum of squares |
| Peak1 | 0.00615 | 0.0011         | 486.3835 | 2.80802        | 29.11756 | 2.49986        | 83.29069 | 2.75207        | 1.19E-04      | 0.99876    | 0.21639                 |
| Peak2 | 0.00615 | 0.0011         | 545.7312 | 0.81341        | 44.15797 | 3.54371        | 70.89888 | 2.22203        |               |            |                         |
| Peak3 | 0.00615 | 0.0011         | 625.183  | 0.48769        | 65.70438 | 2.27019        | 85.78323 | 2.26669        |               |            |                         |
| Peak4 | 0.00615 | 0.0011         | 709.2455 | 1.99284        | 15.30088 | 1.03715        | 78.4675  | 2.40195        |               |            |                         |
| Peak5 | 0.00615 | 0.0011         | 849.9377 | 0.21145        | 14.59768 | 0.18851        | 53.10784 | 0.51348        |               |            |                         |
| Peak6 | 0.00615 | 0.0011         | 953.7395 | 0.18698        | 95.0567  | 0.5232         | 99.72849 | 0.52444        |               |            |                         |
| Peak7 | 0.00615 | 0.0011         | 1052.774 | 0.19262        | 75.54236 | 0.48214        | 84.16229 | 0.32732        |               |            |                         |
| Peak8 | 0.00615 | 0.0011         | 1174.34  | 0.50725        | 2.80202  | 0.11436        | 40.39047 | 1.42357        |               |            |                         |

• **KS-30**

**Table S 5:** Raman peak fitting parameters for normalized spectrum below 400  $\text{cm}^{-1}$ .

| Peak  | $y_0$   |                | $x_c$    |                | $A$      |                | $w$      |                | Statistics    |            |                         |
|-------|---------|----------------|----------|----------------|----------|----------------|----------|----------------|---------------|------------|-------------------------|
|       | Value   | Standard Error | Value    | Standard Error | Value    | Standard Error | Value    | Standard Error | Red. $\chi^2$ | Adj. $R^2$ | Residual Sum of squares |
| Peak1 | -0.0133 | 0.0038         | 54.92367 | 0.21666        | 4.94867  | 0.38873        | 18.50264 | 0.50648        | 2.96E-05      | 0.99964    | 0.02125                 |
| Peak2 | -0.0133 | 0.0038         | 78.42958 | 0.12667        | 18.33356 | 0.56964        | 29.348   | 0.8612         |               |            |                         |
| Peak3 | -0.0133 | 0.0038         | 105.2179 | 0.82869        | 3.62118  | 0.54111        | 24.22341 | 1.2925         |               |            |                         |
| Peak4 | -0.0133 | 0.0038         | 106.7924 | 0.70507        | 48.81885 | 1.08989        | 82.46893 | 1.11368        |               |            |                         |
| Peak5 | -0.0133 | 0.0038         | 199.8253 | 3.13446        | 6.62593  | 0.60459        | 93.75928 | 5.11281        |               |            |                         |
| Peak6 | -0.0133 | 0.0038         | 339.2806 | 0.493          | 7.93756  | 0.63281        | 91.00105 | 3.48381        |               |            |                         |

**Table S 6:** Raman peak fitting parameters for the normalized spectrum in the region 400 to 1200  $\text{cm}^{-1}$  of KS-30 sample

| Peak  | $y_0$   |                | $x_c$    |                | $A$      |                | $w$      |                | Statistics    |            |                         |
|-------|---------|----------------|----------|----------------|----------|----------------|----------|----------------|---------------|------------|-------------------------|
|       | Value   | Standard Error | Value    | Standard Error | Value    | Standard Error | Value    | Standard Error | Red. $\chi^2$ | Adj. $R^2$ | Residual Sum of squares |
| Peak1 | 0.00272 | 9.89E-04       | 470.1634 | 0.60121        | 12.3009  | 0.49216        | 60.82341 | 0.98816        | 5.31E-05      | 0.99928    | 0.09587                 |
| Peak2 | 0.00272 | 9.89E-04       | 550.374  | 0.43372        | 61.20713 | 1.19271        | 92.38942 | 1.3609         |               |            |                         |
| Peak3 | 0.00272 | 9.89E-04       | 627.2995 | 0.29809        | 20.71865 | 1.37321        | 57.63732 | 1.05133        |               |            |                         |
| Peak4 | 0.00272 | 9.89E-04       | 666.1207 | 3.17297        | 35.25029 | 2.18696        | 120.214  | 3.44887        |               |            |                         |
| Peak5 | 0.00272 | 9.89E-04       | 849.9686 | 0.15325        | 13.23629 | 0.13061        | 52.89882 | 0.38023        |               |            |                         |
| Peak6 | 0.00272 | 9.89E-04       | 954.9805 | 0.13351        | 89.58509 | 0.3569         | 100.9649 | 0.37719        |               |            |                         |
| Peak7 | 0.00272 | 9.89E-04       | 1053.616 | 0.14932        | 60.72508 | 0.3237         | 82.16973 | 0.26019        |               |            |                         |
| Peak8 | 0.00272 | 9.89E-04       | 1182.872 | 0.41374        | 4.02402  | 0.12736        | 58.05731 | 1.34104        |               |            |                         |

• **KS-35**

**Table S 7:** Raman peak fitting parameters for normalized spectrum below 400  $\text{cm}^{-1}$ .

| Peak  | $y_0$   |                | $x_c$    |                | $A$      |                | $w$      |                | Statistics    |            |                         |
|-------|---------|----------------|----------|----------------|----------|----------------|----------|----------------|---------------|------------|-------------------------|
|       | Value   | Standard Error | Value    | Standard Error | Value    | Standard Error | Value    | Standard Error | Red. $\chi^2$ | Adj. $R^2$ | Residual Sum of squares |
| Peak1 | 0.16595 | 5.45E-04       | 54.16724 | 0.20574        | 3.83783  | 0.33728        | 17.31208 | 0.53889        | 4.88E-05      | 0.9992     | 0.03478                 |
| Peak2 | 0.16595 | 5.45E-04       | 76.01835 | 0.23301        | 11.61747 | 1.76981        | 28.19476 | 0.96965        |               |            |                         |
| Peak3 | 0.16595 | 5.45E-04       | 96.04014 | 1.78975        | 29.33584 | 13.34054       | 57.17887 | 6.72935        |               |            |                         |
| Peak4 | 0.16595 | 5.45E-04       | 126.2496 | 24.55725       | 14.73698 | 11.65213       | 86.17484 | 16.57519       |               |            |                         |
| Peak5 | 0.16595 | 5.45E-04       | 355.2037 | 0.8213         | 0.90557  | 0.06104        | 34.6487  | 2.216          |               |            |                         |

**Table S 8:** Raman peak fitting parameters for the normalized spectrum in the region 400 to 1200  $\text{cm}^{-1}$  of KS-35 sample

| Peak  | $y_0$  |                | $x_c$    |                | $A$      |                | $w$      |                | Statistics    |            |                         |
|-------|--------|----------------|----------|----------------|----------|----------------|----------|----------------|---------------|------------|-------------------------|
|       | Value  | Standard Error | Value    | Standard Error | Value    | Standard Error | Value    | Standard Error | Red. $\chi^2$ | Adj. $R^2$ | Residual Sum of squares |
| Peak1 | 0.1309 | 0.00106        | 459.2497 | 0.4033         | 4.51935  | 0.27649        | 48.22967 | 1.34986        | 3.94E-05      | 0.99894    | 0.06946                 |
| Peak2 | 0.1309 | 0.00106        | 543.4008 | 0.30025        | 52.33016 | 0.66419        | 115.7224 | 1.50686        |               |            |                         |
| Peak3 | 0.1309 | 0.00106        | 631.5511 | 0.25958        | 17.89265 | 1.09643        | 60.10321 | 1.03479        |               |            |                         |
| Peak4 | 0.1309 | 0.00106        | 681.3455 | 2.81326        | 21.32343 | 1.314          | 109.9561 | 3.47624        |               |            |                         |
| Peak5 | 0.1309 | 0.00106        | 855.6108 | 0.20191        | 11.65388 | 0.14341        | 57.9896  | 0.4902         |               |            |                         |
| Peak6 | 0.1309 | 0.00106        | 952.7412 | 0.12544        | 61.79815 | 0.29674        | 89.55689 | 0.39347        |               |            |                         |
| Peak7 | 0.1309 | 0.00106        | 1049.542 | 0.17578        | 46.25663 | 0.28174        | 84.14141 | 0.33894        |               |            |                         |
| Peak8 | 0.1309 | 0.00106        | 1177.189 | 0.33256        | 4.97266  | 0.13494        | 62.00259 | 1.12996        |               |            |                         |

• **KS-40**

**Table S 9:** Raman peak fitting parameters for normalized spectrum below 400  $\text{cm}^{-1}$ .

| Peak  | $y_0$   |                | $x_c$    |                | $A$      |                | $w$      |                | Statistics    |            |                         |
|-------|---------|----------------|----------|----------------|----------|----------------|----------|----------------|---------------|------------|-------------------------|
|       | Value   | Standard Error | Value    | Standard Error | Value    | Standard Error | Value    | Standard Error | Red. $\chi^2$ | Adj. $R^2$ | Residual Sum of squares |
| Peak1 | 0.11559 | 5.18E-04       | 53.09204 | 0.14698        | 2.27889  | 0.16633        | 14.77648 | 0.48918        | 3.87E-05      | 0.99934    | 0.02559                 |
| Peak2 | 0.11559 | 5.18E-04       | 76.57989 | 0.22582        | 16.14297 | 1.44677        | 35.22637 | 0.69234        |               |            |                         |
| Peak3 | 0.11559 | 5.18E-04       | 97.18416 | 1.88072        | 29.11423 | 9.77642        | 66.59474 | 6.117          |               |            |                         |
| Peak4 | 0.11559 | 5.18E-04       | 142.8708 | 26.54847       | 15.5234  | 8.8912         | 113.2327 | 27.31031       |               |            |                         |
| Peak5 | 0.11559 | 5.18E-04       | 247.0995 | 0.68069        | 1.12306  | 0.1889         | 33.84891 | 2.86318        |               |            |                         |

**Table S 10:** Raman peak fitting parameters for the normalized spectrum in the region 400 to 1200  $\text{cm}^{-1}$  of KS-40 sample

| Peak  | $y_0$   |                | $x_c$    |                | $A$      |                | $w$      |                | Statistics    |            |                         |
|-------|---------|----------------|----------|----------------|----------|----------------|----------|----------------|---------------|------------|-------------------------|
|       | Value   | Standard Error | Value    | Standard Error | Value    | Standard Error | Value    | Standard Error | Red. $\chi^2$ | Adj. $R^2$ | Residual Sum of squares |
| Peak1 | 0.08104 | 0.00113        | 475.0307 | 0.91745        | 12.79184 | 0.49961        | 71.85398 | 1.44767        | 3.08E-05      | 0.99812    | 0.05388                 |
| Peak2 | 0.08104 | 0.00113        | 548.6886 | 0.47952        | 23.56274 | 0.61197        | 75.74466 | 1.43034        |               |            |                         |
| Peak3 | 0.08104 | 0.00113        | 629.3268 | 0.30405        | 14.22381 | 0.85965        | 61.04318 | 1.17219        |               |            |                         |
| Peak4 | 0.08104 | 0.00113        | 682.5886 | 2.74052        | 27.21731 | 1.24826        | 139.143  | 3.79569        |               |            |                         |
| Peak5 | 0.08104 | 0.00113        | 847.9626 | 0.28348        | 7.76866  | 0.14706        | 59.93628 | 0.73801        |               |            |                         |
| Peak6 | 0.08104 | 0.00113        | 955.4691 | 0.12407        | 55.31858 | 0.29314        | 111.5095 | 0.55931        |               |            |                         |
| Peak7 | 0.08104 | 0.00113        | 1055.61  | 0.14992        | 22.0821  | 0.19117        | 66.66812 | 0.31954        |               |            |                         |
| Peak8 | 0.08104 | 0.00113        | 1167.361 | 0.23618        | 5.47626  | 0.13665        | 58.55284 | 0.93107        |               |            |                         |

## 2 FTIR analysis

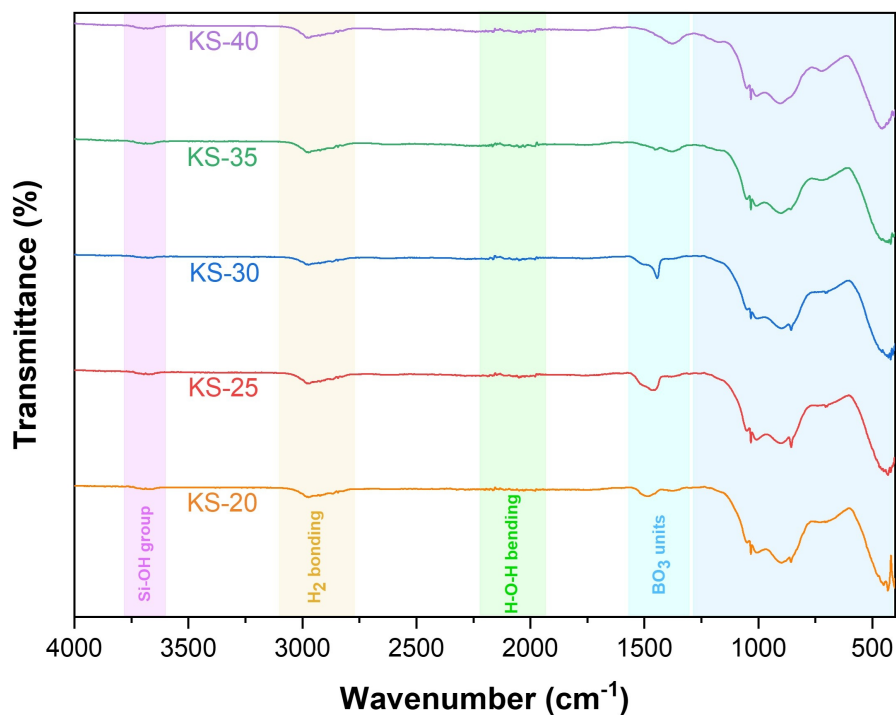

**Figure S 2:** FTIR transmittance spectra of the prepared glass series over the full wavenumber range (4000–400  $\text{cm}^{-1}$ ).
